# Supplementary material for: Contrasting effects of ammonium and nitrate additions on the biomass of soil microbial communities and enzyme activities in subtropical China
Source: Copernicus journal article supplement (doi:10.5194/bg-14-4815-2017), 2017-10-27
Supplement: Supplementary file 1 [file bg-14-4815-2017-supplement.pdf]

Supplement of Biogeosciences, 14, 4815–4827, 2017  
<https://doi.org/10.5194/bg-14-4815-2017-supplement>  
© Author(s) 2017. This work is distributed under  
the Creative Commons Attribution 3.0 License.

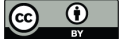

*Supplement of*

## **Contrasting effects of ammonium and nitrate additions on the biomass of soil microbial communities and enzyme activities in subtropical China**

**Chuang Zhang et al.**

*Correspondence to:* Xin-Yu Zhang (zhangxy@igsnr.ac.cn) and Hong-Tao Zou (zouhongtao2001@163.com)

The copyright of individual parts of the supplement might differ from the CC BY 3.0 License.

1 **Supplementary materials**

2

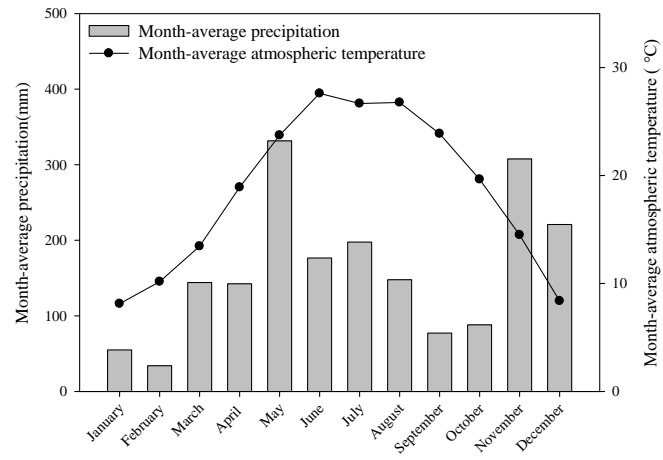

3

4 **Fig S1.** Average monthly atmospheric temperature and precipitation at the study site during 2015.

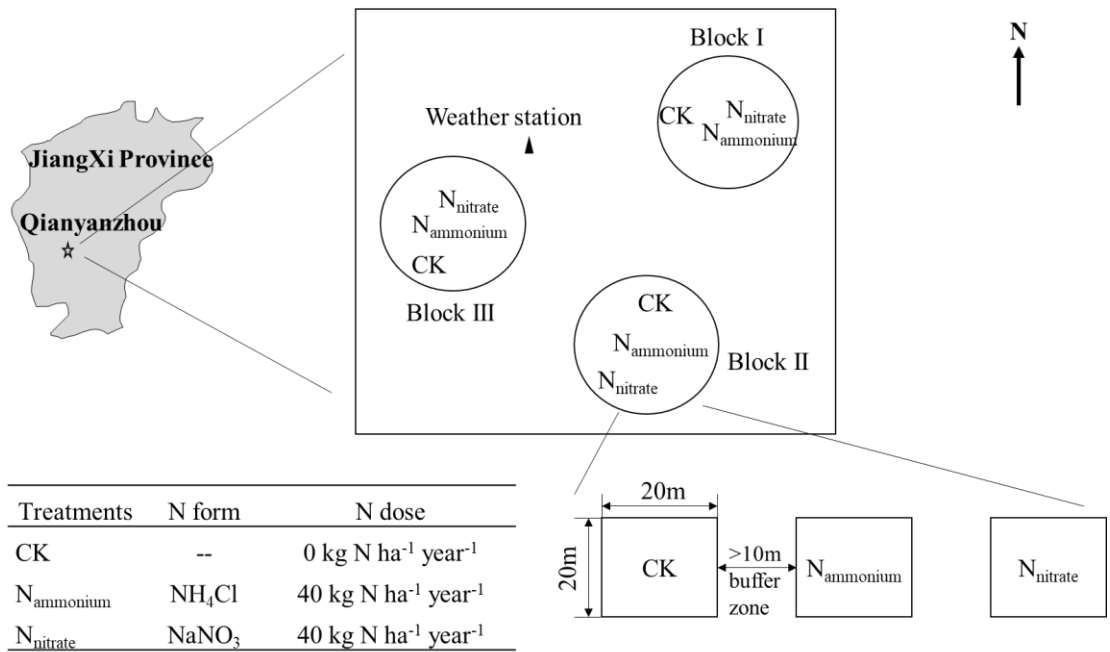

5

6 **Fig S2.** The schematic diagram of the experimental treatments.

7 **Table S 1** Enzymes and their corresponding substrates and functions.

| Enzyme                               | Ec       | Abbrevia<br>tion | Substrate                                | Function                                                                                                                |
|--------------------------------------|----------|------------------|------------------------------------------|-------------------------------------------------------------------------------------------------------------------------|
| Peroxidase                           | 1.11.1.7 | PER              | L-DOPA                                   | Oxidize lignin and aromatic compounds using H <sub>2</sub> O <sub>2</sub> or secondary oxidants as an electron acceptor |
| Phenol oxidase                       | 1.10.3.2 | PPO              | L-DOPA                                   | Oxidize phenolic compounds using oxygen as an electron acceptor                                                         |
| $\alpha$ -1,4-glucosidase            | 3.2.1.20 | $\alpha$ G       | 4-MUB- $\alpha$ -D-glucoside             | Releases glucose from starch                                                                                            |
| $\beta$ -1,4-glucosidase             | 3.2.1.21 | $\beta$ G        | 4-MUB- $\beta$ -D-glucoside              | Releases glucose from cellulose                                                                                         |
| Cellobiohydrolase                    | 3.2.1.91 | CBH              | 4-MUB- $\beta$ -D-cellobioside           | Releases disaccharides from cellulose                                                                                   |
| $\beta$ -1,4-xylosidase              | 3.2.1.37 | $\beta$ X        | 4-MUB- $\beta$ -D-xyloside               | Releases xylose from hemicellulose                                                                                      |
| $\beta$ -1,4-N-acetylglucosaminidase | 3.2.1.14 | NAG              | 4-MUB-N-acetyl- $\beta$ -D-glucosaminide | Releases N-acetyl glucosamine from oligosaccharides                                                                     |
| Acid phosphatase                     | 3.1.3.1  | AP               | 4-MUB-phosphate                          | Releases phosphate groups                                                                                               |

8 **Table S2** Time-independent seasonal variations in ammonium and PLFAs. Small letters represent  
9 significant differences between the sampling time ( $P < 0.05$ ), error bars represent means  $\pm$  standard errors  
10 (n=9).

| Months  | Ammonium<br>mg kg <sup>-1</sup> | Total PLFA<br>nmol g <sup>-1</sup> | Bacteria<br>nmol g <sup>-1</sup> | G <sup>-</sup><br>nmol g <sup>-1</sup> |
|---------|---------------------------------|------------------------------------|----------------------------------|----------------------------------------|
| March   | 23.5 $\pm$ 1.0a                 | 9.2 $\pm$ 0.2c                     | 7.1 $\pm$ 0.2c                   | 2.5 $\pm$ 0.1c                         |
| June    | 10.6 $\pm$ 1.0b                 | 11.0 $\pm$ 0.2b                    | 7.7 $\pm$ 0.2b                   | 3.1 $\pm$ 0.1b                         |
| October | 7.5 $\pm$ 1.0b                  | 16.7 $\pm$ 0.2a                    | 13.8 $\pm$ 0.2a                  | 5.0 $\pm$ 0.1a                         |

11
